# Supplementary material for: Effects of Antibiotic Use on Saliva Antibody Content and Oral Microbiota in Sprague Dawley Rats
Source: Front Cell Infect Microbiol. 2022 Jan 31;12:721691. doi: 10.3389/fcimb.2022.721691 (PMC8843035; doi:10.3389/fcimb.2022.721691)
Supplement: Supplementary Table 1 — Antibiotic species and their target strains. [file Table_1.xls]

## Sheet: 多样性指数表
Sample\Estimators	shannon	simpson	ace	chao	coverage
a5	2.63423	0.129787	350.962	349.395	0.998136
m1	2.5108	0.126589	387.488	357.733	0.997612
m3	1.84973	0.271049	367.541	231.667	0.998866
c5	2.16696	0.170261	364.863	274.6	0.998263
s1	1.88161	0.387539	334.615	394.091	0.997879
c1	3.31832	0.074409	367.182	364.122	0.998485
c4	2.49349	0.120342	348.326	239.964	0.998446
s5	3.62743	0.095353	710.669	721.288	0.997062
s6	2.7997	0.09325	571.3	447.717	0.997057
s2	2.64405	0.112912	418.201	368.621	0.997031
s3	2.75481	0.152288	257.541	276.5	0.998755
m6	1.97138	0.232935	233.282	181.368	0.998881
c2	2.62687	0.128288	369.205	349.438	0.997836
a4	2.51064	0.14488	399.253	332.571	0.99777
c3	2.51293	0.156833	379.968	304.786	0.997826
a1	2.43718	0.144455	339.859	337.286	0.997789
s4	2.59666	0.12129	677.242	473.957	0.996295
m4	1.85744	0.284274	336.011	212.957	0.998201
a6	1.86249	0.205854	448	289.375	0.997969
c6	2.34383	0.13477	265.666	230.889	0.99861
a3	2.92093	0.103666	426.261	406.644	0.997933
m2	2.49225	0.129232	469.955	339.375	0.997641
m5	2.16972	0.197322	369.82	278	0.998138
a2	2.91468	0.088877	382.588	366.488	0.997536
