# Supplementary material for: Effects of Antibiotic Use on Saliva Antibody Content and Oral Microbiota in Sprague Dawley Rats
Source: Front Cell Infect Microbiol. 2022 Jan 31;12:721691. doi: 10.3389/fcimb.2022.721691 (PMC8843035; doi:10.3389/fcimb.2022.721691)
Supplement: Supplementary Table 3 — Comparison of significant bacterial genus in all groups [file Table_3.xls]

## Sheet: 样本信息统计表
Sample\Info	Seq_num	Base_num	Mean_length	Min_length	Max_length
c2	46664	19968264	427.916	250	439
m2	35354	15116857	427.585	358	496
s3	42522	18049958	424.485	377	432
m4	35805	15243683	425.742	394	478
c4	50912	21663588	425.51	269	506
c5	38682	16415082	424.36	366	439
c1	37666	16097928	427.386	239	437
s4	43495	18418021	423.451	207	460
a3	47630	20272561	425.626	369	478
c6	46198	19784739	428.26	391	434
m5	43098	18390035	426.703	270	432
a2	43757	18555357	424.055	360	432
m1	48461	20675771	426.648	228	507
m3	42324	17991186	425.082	270	431
a4	45627	19390595	424.981	262	431
s1	38520	16402172	425.809	331	455
s5	36654	15469125	422.031	375	452
a6	45837	19455655	424.453	369	439
s6	45707	19408231	424.623	239	432
c3	45752	19530428	426.876	262	435
a5	37327	15841165	424.389	254	435
a1	38020	16146096	424.674	291	435
s2	51827	21942564	423.381	203	478
m6	43026	18237888	423.881	222	464
